# Supplementary material for: The enhanced reduction of bromate by highly reactive and dispersive green nano-zerovalent iron (G-NZVI) synthesized with onion peel extract
Source: Royal Society of Chemistry journal article supplement (doi:10.1039/d0ra09897c), 2021-01-01
Supplement: d0ra09897c1.pdf [file d0ra09897c1.pdf]

Supporting information

# **Enhanced reduction of bromate by highly reactive and dispersive green nano-zerovalent iron (G-NZVI) synthesized with onion peel extract**

**Olga Lem <sup>a</sup>, Sunho Yoon <sup>b</sup>, Sungjun Bae<sup>b</sup>, Woojin Lee <sup>\*a</sup>**

<sup>a</sup>Department of Civil and Environmental Engineering, National Laboratory Astana, Nazarbayev  
University, Nur-sultan 010000, Republic of Kazakhstan

<sup>b</sup>Department of Civil and Environmental Engineering, Konkuk University, Seoul 05029, Republic of  
Korea

\*Corresponding author: phone: +7-7172-70-6540

E-mail: [wojin.lee@nu.edu.kz](mailto:wojin.lee@nu.edu.kz)

## Supporting information

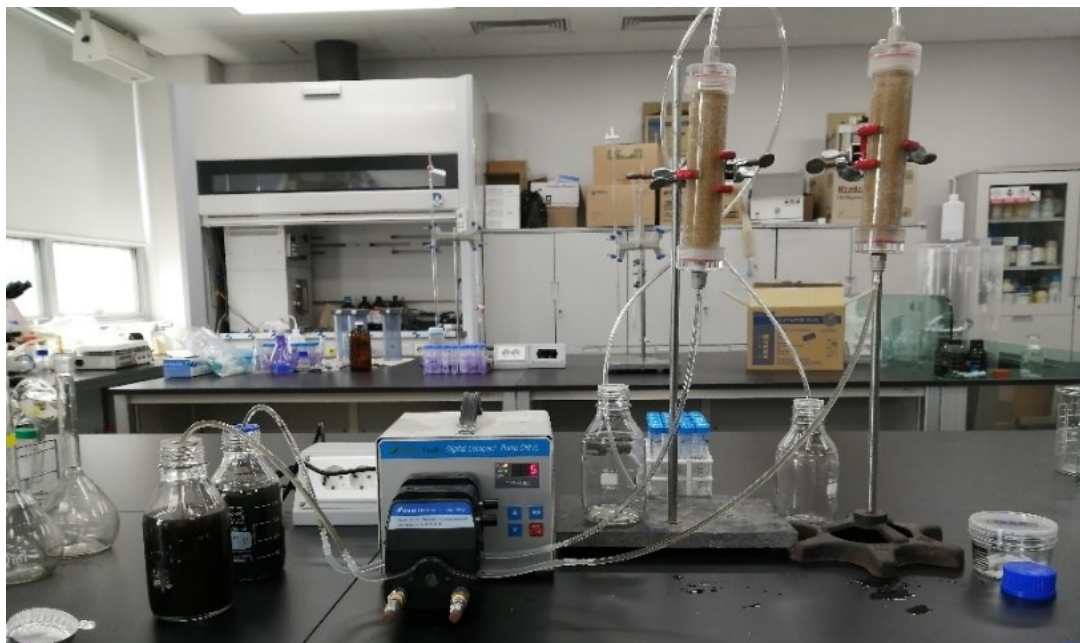

Figure S1. Experimental set up of mobility test

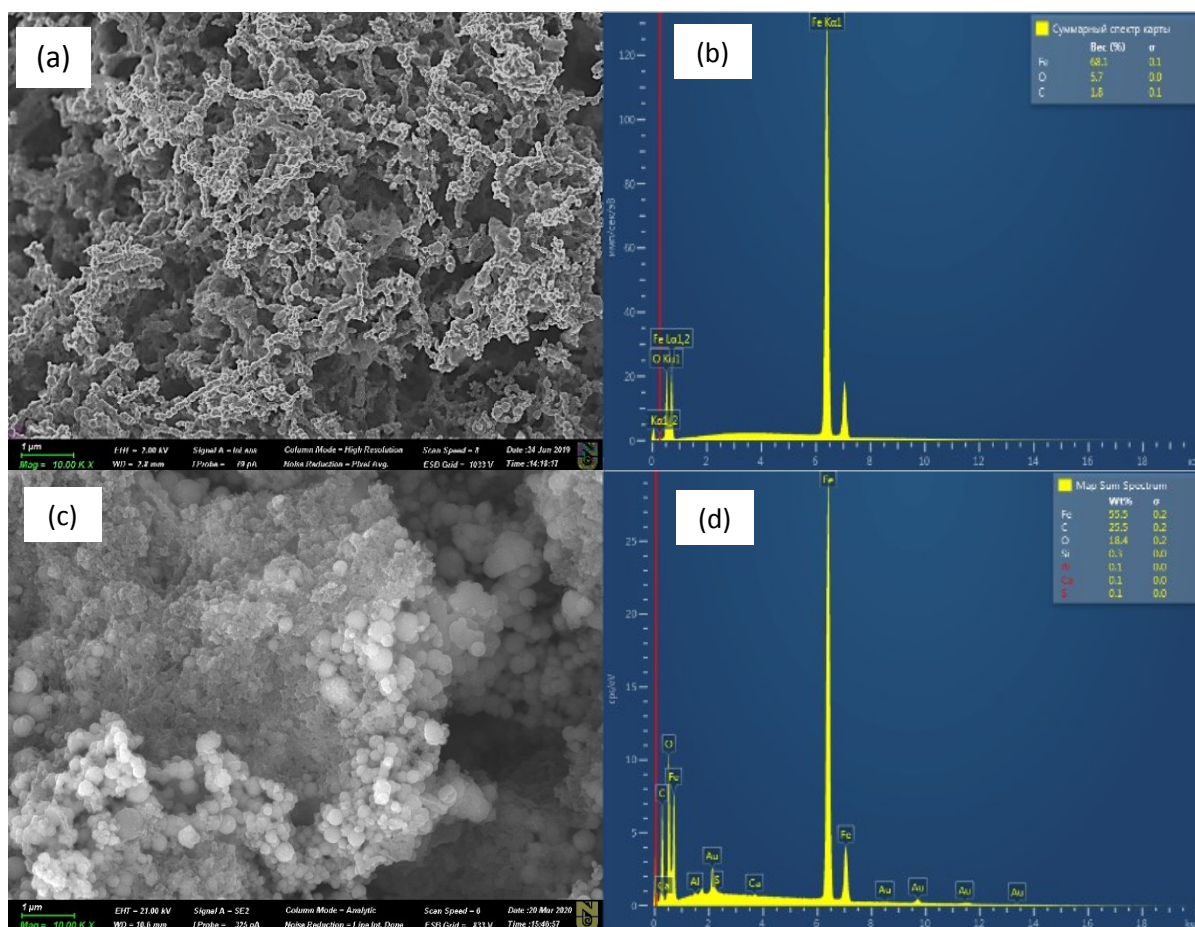

Figure S2. SEM-EDS images of NZVI ((a) and (b)) and G-NZVI ((c) and (d)).

## Supporting information

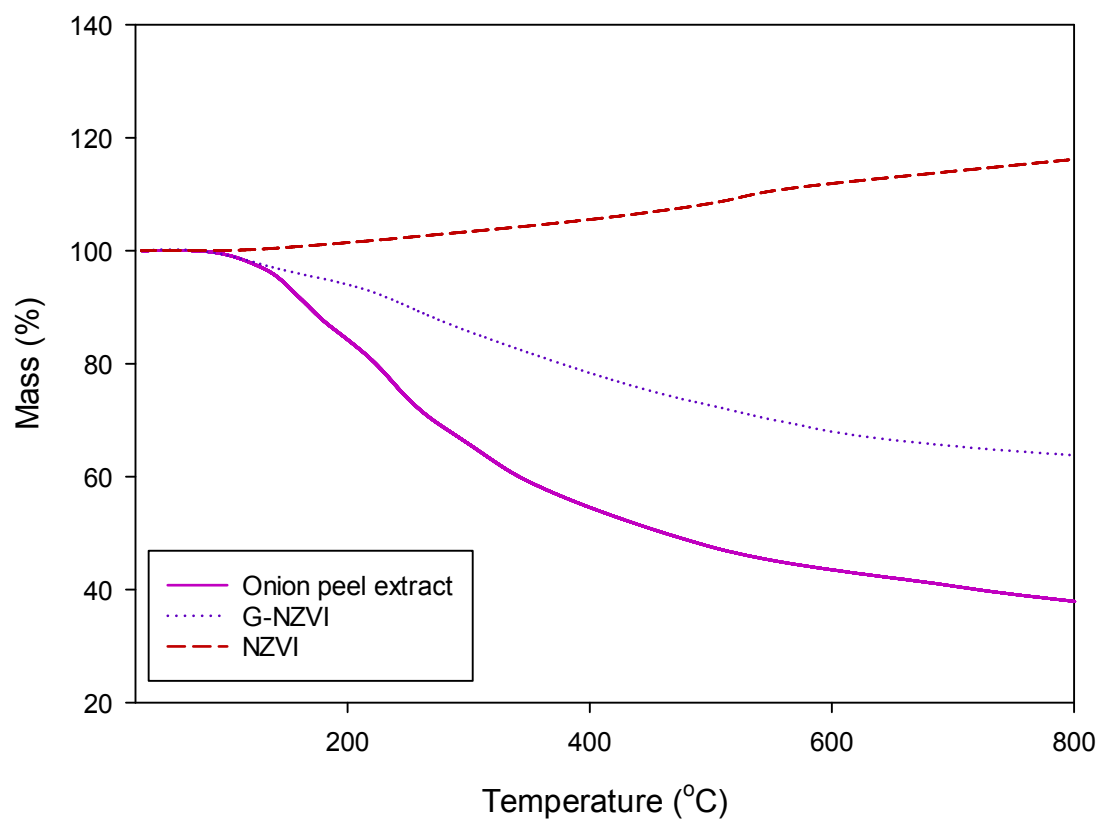

**Figure S3.** TGA profiles of NZVI, onion peel extract, and G-NZVI.

## Supporting information

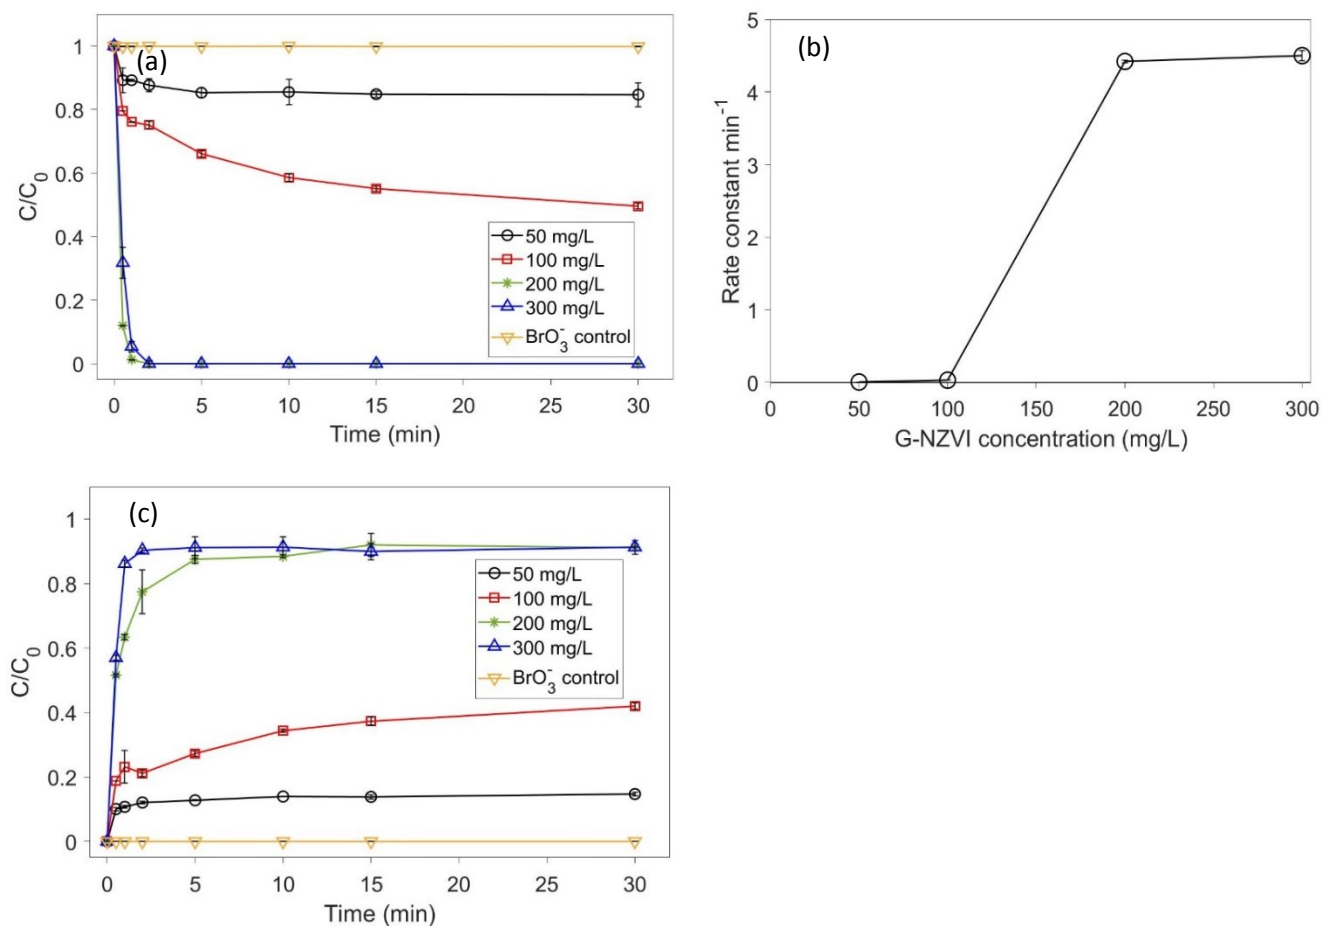

**Figure S4.** Effect of G-NZVI loading on the removal efficiency of  $\text{BrO}_3^-$  (50 mg/L) (a), the  $k_1$  values obtained from each suspension (b), and corresponding  $\text{Br}^-$  formation (c).

## Supporting information

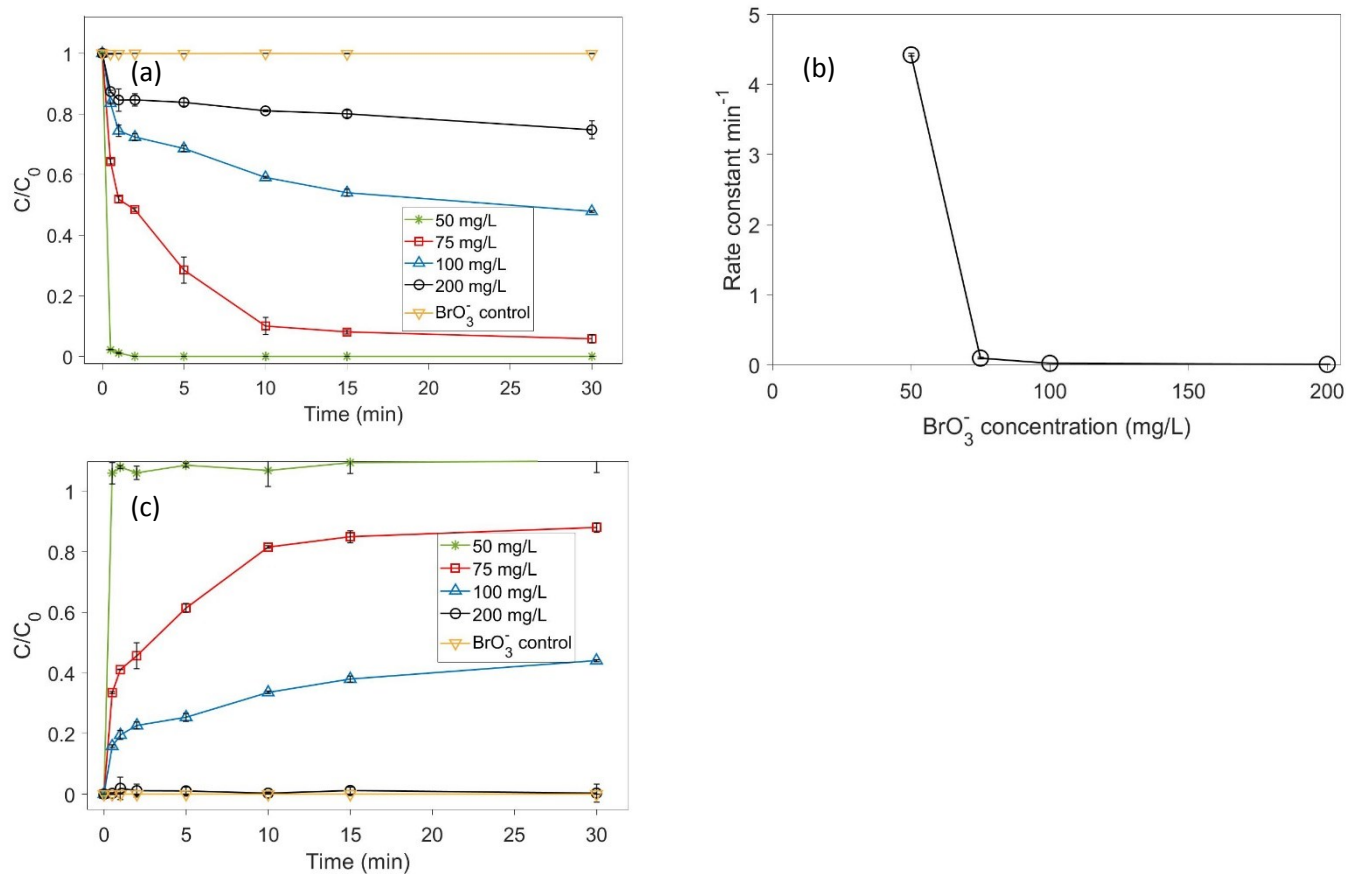

**Figure S5.** Effect of  $\text{BrO}_3^-$  concentration on the removal efficiency of  $\text{BrO}_3^-$  by G-NZVI (a), the  $k_1$  values obtained from each suspension (b), and corresponding  $\text{Br}^-$  formation (c).

## Supporting information

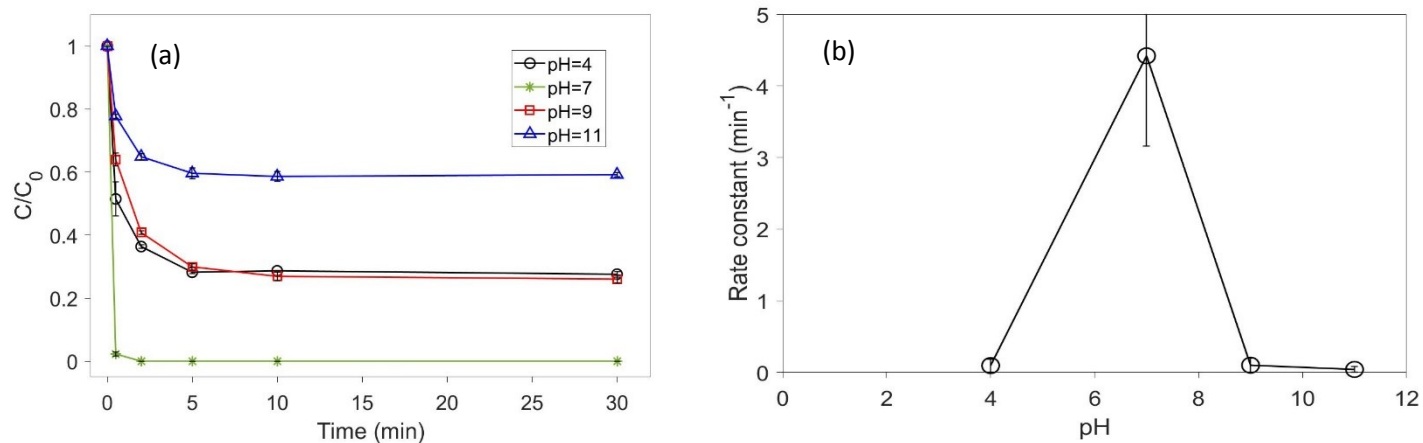

**Figure S6.** Effect of pH on the removal efficiency of  $\text{BrO}_3^-$  by G-NZVI (a) and the  $k_1$  values obtained from each suspension (b).

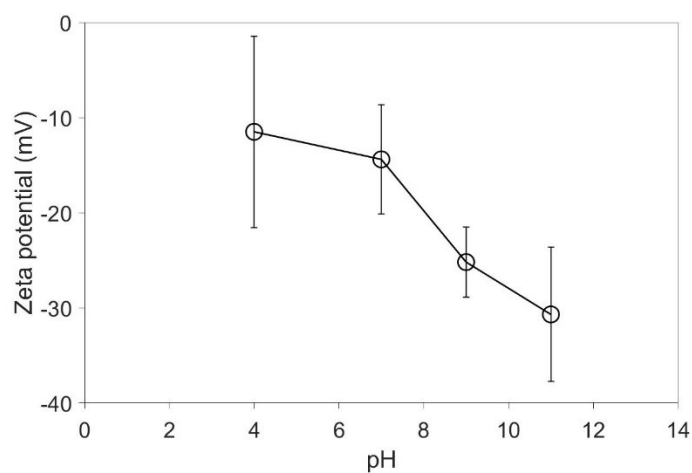

**Figure S7.** Zeta potential of G-NZVI as a function of pH.

## Supporting information

**Table**

|                                                           | Polyphenols<br>(0.3-0.8) | BrO <sub>3</sub> <sup>-</sup> /Br <sup>-</sup><br>(1.478) | Fe <sup>3+</sup> /Fe <sup>2+</sup><br>(0.771) | Fe <sup>3+</sup> /Fe <sup>0</sup><br>(-0.037) | Fe <sup>2+</sup> /Fe <sup>0</sup><br>(-0.44) | <b>S1.</b>       |
|-----------------------------------------------------------|--------------------------|-----------------------------------------------------------|-----------------------------------------------|-----------------------------------------------|----------------------------------------------|------------------|
| Polyphenols<br>(0.3-0.8)*                                 |                          | ΔG>0,<br>NS**                                             | ΔG<0,<br>S***                                 | ΔG<0,<br>S                                    | ΔG<0,<br>S                                   | Theor<br>eticall |
| BrO <sub>3</sub> <sup>-</sup> /Br <sup>-</sup><br>(1.478) | ΔG>0,<br>NS              |                                                           | ΔG>0,<br>NS                                   | ΔG<0,<br>S                                    | ΔG<0,<br>S                                   | y<br>calcul      |
| Fe <sup>3+</sup> /Fe <sup>2+</sup><br>(0.771)             | ΔG<0,<br>S               | ΔG>0,<br>NS                                               |                                               |                                               |                                              | ated             |
| Fe <sup>3+</sup> /Fe <sup>0</sup><br>(-0.037)             | ΔG<0,<br>S               | ΔG<0,<br>S                                                |                                               |                                               |                                              | Gibbs<br>free    |
| Fe <sup>2+</sup> /Fe <sup>0</sup><br>(-0.44)              | ΔG<0,<br>S               | ΔG<0,<br>S                                                |                                               |                                               |                                              | energ            |

y values and spontaneity of reactions

\*Potential energy (V)

\*\*NS: non-spontaneous reaction

\*\*\*S: spontaneous reaction

**Table S2.** Comparison of kinetic rate constants of pseudo-first-order and second-order reactions

## Supporting information

| G-NZVI loading<br>mg/L                        | Pseudo-first-order                           |                | Second-order                     |                |
|-----------------------------------------------|----------------------------------------------|----------------|----------------------------------|----------------|
|                                               | Rate constant ( $k_1$ )<br>min <sup>-1</sup> | R <sup>2</sup> | Rate constant ( $k_2$ )<br>M/min | R <sup>2</sup> |
| 50                                            | 0.006                                        | 0.43           | 0.0071                           | 0.42           |
| 100                                           | 0.0318                                       | 0.81           | 0.0456                           | 0.86           |
| 200                                           | 4.42                                         | 0.98           | 28.301                           | 0.90           |
| 300                                           | 4.5                                          | 0.96           | 8.7516                           | 0.85           |
| BrO <sub>3</sub> <sup>-</sup> loading<br>mg/L | Rate constant ( $k_1$ )<br>min <sup>-1</sup> | R <sup>2</sup> | Rate constant ( $k_2$ )<br>M/min | R <sup>2</sup> |
| 50                                            | 4.42                                         | 0.98           | 27.005                           | 0.90           |
| 75                                            | 0.088                                        | 0.78           | 0.057                            | 0.94           |
| 100                                           | 0.022                                        | 0.81           | 0.033                            | 0.87           |
| 200                                           | 0.006                                        | 0.85           | 0.008                            | 0.68           |
